# Supplementary material for: Hypoxia dynamics on FMISO-PET in combination with PD-1/PD-L1 expression has an impact on the clinical outcome of patients with Head-and-neck Squamous Cell Carcinoma undergoing Chemoradiation
Source: PubMed Central journal article supplement (PMC7415814; doi:10.7150/thno.48392), 2020-07-23
Supplement: thnov10p9395s1.pdf [file thnov10p9395s1.pdf]

**Supplementary table 1: Patient characteristics including demographic and tumor-related parameters**

(n=49).

| <b>Patient characteristics</b> |          |          |
|--------------------------------|----------|----------|
| <b>Age (years)</b>             |          |          |
| Median                         | 60       |          |
| Minimum                        | 34       |          |
| Maximum                        | 78       |          |
| <b>Gender</b>                  |          |          |
|                                | <b>n</b> | <b>%</b> |
| Male                           | 44       | 89.8     |
| Female                         | 5        | 10.2     |
| <b>Tumor location</b>          |          |          |
| Oral cavity                    | 2        | 4.1      |
| Oropharynx                     | 19       | 38.8     |
| Hypopharynx                    | 12       | 24.5     |
| Larynx                         | 7        | 14.3     |
| Multi-level                    | 9        | 18.4     |
| <b>Tumor extent</b>            |          |          |
| T1                             | 1        | 2.0      |
| T2                             | 4        | 8.2      |
| T3                             | 14       | 28.6     |
| T4                             | 30       | 61.2     |
| <b>Nodal status</b>            |          |          |
| N0                             | 4        | 8.2      |
| N1                             | 1        | 2.0      |
| N2a                            | 0        | 0.0      |
| N2b                            | 9        | 18.4     |
| N2c                            | 35       | 71.4     |
| <b>HPV status</b>              |          |          |
| HPV positive                   | 9        | 18.4     |
| HPV negative                   | 40       | 81.6     |

Abbreviations: HPV=human papillomavirus

**Supplementary table 2:** Description of antibodies used for immunohistochemical stains and corresponding antigen retrieval.

| <b>Antigen</b> | <b>Clone</b>    | <b>Company</b> | <b>Dilution</b> | <b>Antigen retrieval</b> |
|----------------|-----------------|----------------|-----------------|--------------------------|
| PD-1           | NAT105          | Roche/Ventana  | Prediluted      | Tris-EDTA buffer pH 9    |
| PD-L1          | SP263           | Roche/Ventana  | Prediluted      | Tris-EDTA buffer pH 9    |
| CAIX           | C48E            | Cell Signaling | 1:300           | pH 6.1 citrate buffer    |
| CD34           | QBEnd10 (IR632) | DAKO           | Prediluted      | pH 6.1 citrate buffer    |
| HIF1 $\alpha$  | MAB1935         | R&D            | 1:100           | pH 6.1 citrate buffer    |

**Supplementary table 3:** Tests for potential differences regarding the PD-1 and PD-L1 expression (including the tumoral PD-L1 expression [TPS]) depending on the HPV status. *P* values of the appropriate tests are indicated.

|            |   | PD-1 tumor         | PD-1 stromal       | PD-L1 tumor        | PD-L1 stromal      | TPS                |
|------------|---|--------------------|--------------------|--------------------|--------------------|--------------------|
| HPV status | p | 0.805 <sup>1</sup> | 0.589 <sup>1</sup> | 0.718 <sup>2</sup> | 0.582 <sup>2</sup> | 0.635 <sup>2</sup> |

<sup>1</sup> Chi-square test, <sup>2</sup> Mann-Whitney-U test

**Supplementary figure 1. OS in HNSCC patients undergoing chemoradiation is independent from pre-therapeutic PD-L1 and PD-1 expression on intratumoral immune cells.** OS of HNSCC patients receiving chemoradiation stratified by PD-L1 (A) and PD-1 (B) expression. *P* values are derived from log-rank tests.

**A**

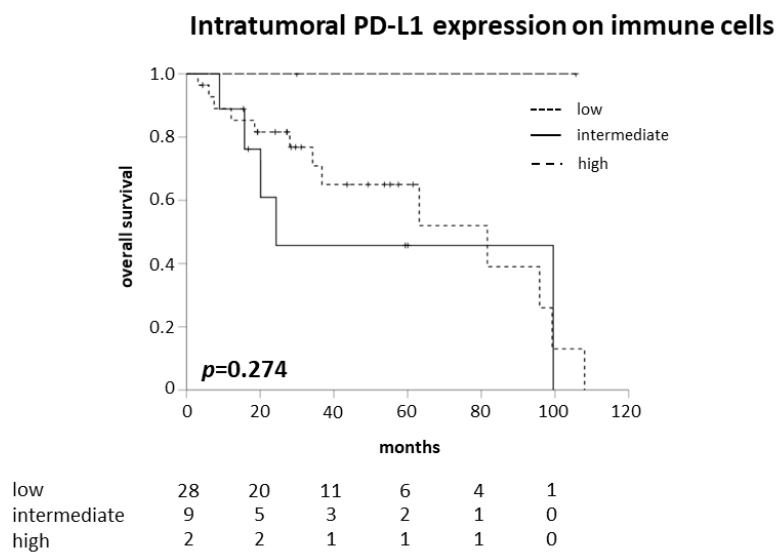

**B**

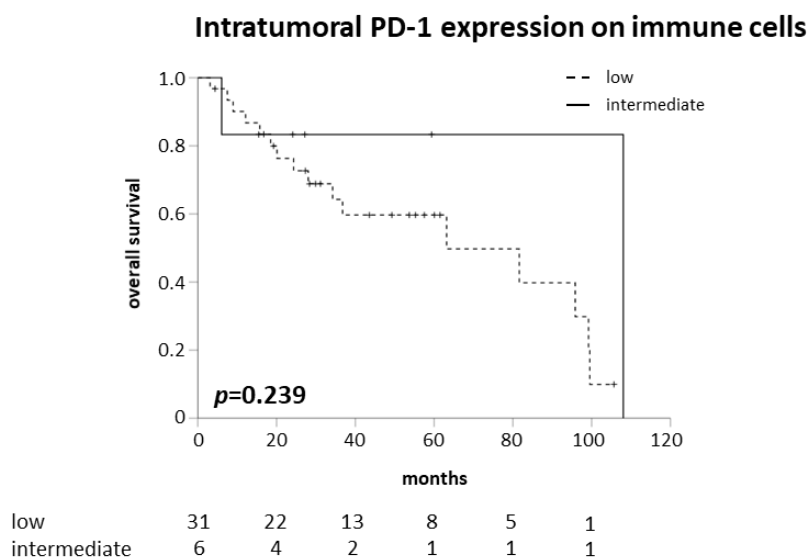

**Supplementary figure 2. Early hypoxia response leads to improved LRC and PFS in HNSCC patients receiving definitive chemoradiation.** LRC (A) and PFS (B) of HNSCC patients stratified by tumor hypoxia resolution between week 0 and 2 of chemoradiation. *P* values are derived from log-rank tests.

**A**

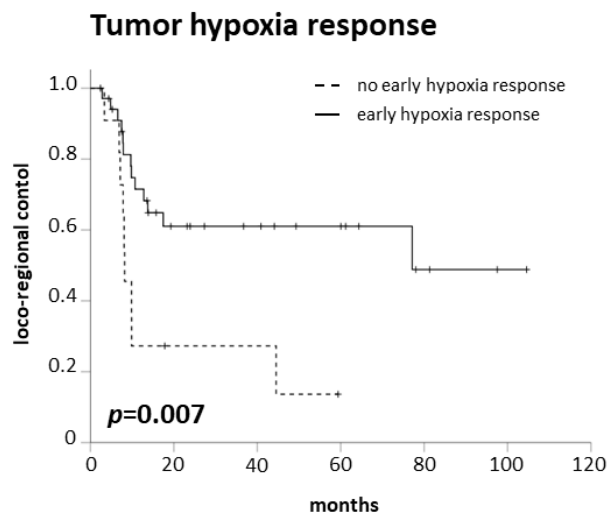

|                           |    |    |    |   |   |   |
|---------------------------|----|----|----|---|---|---|
| no early hypoxia response | 11 | 2  | 2  | 0 | 0 | 0 |
| early hypoxia response    | 35 | 15 | 11 | 8 | 3 | 1 |

**B**

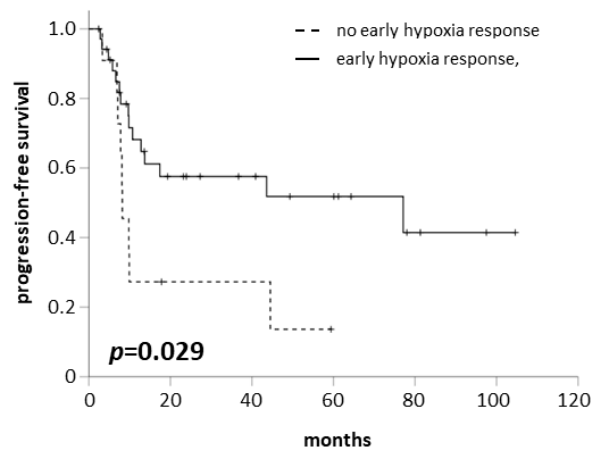

|                           |    |    |    |   |   |   |
|---------------------------|----|----|----|---|---|---|
| no early hypoxia response | 11 | 2  | 2  | 0 | 0 | 0 |
| early hypoxia response    | 35 | 15 | 11 | 8 | 3 | 1 |

**Supplementary figure 3. Persistent tumor-associated hypoxia and high TPS result in worse LRC and PFS.** LRC (A) and PFS (B) of HNSCC patients with missing early hypoxia resolution (between weeks 0 and 2) and high TPS compared to the remaining patients with either present early hypoxia resolution or low TPS. *P* values are derived from log-rank tests.

**A**

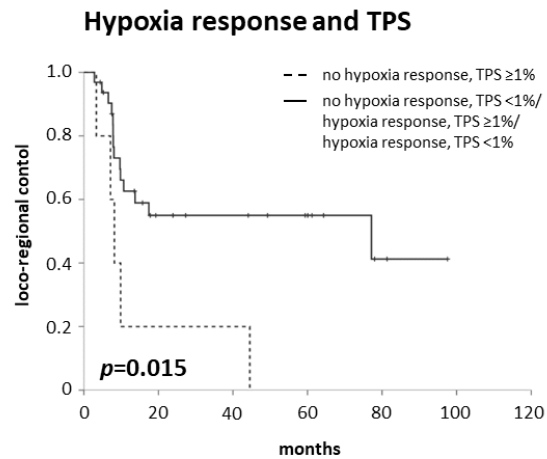

|                                                                                                           |    |    |    |   |   |   |
|-----------------------------------------------------------------------------------------------------------|----|----|----|---|---|---|
| no hypoxia response, TPS $\geq 1\%$                                                                       | 5  | 1  | 1  | 0 | 0 | 0 |
| no hypoxia response, TPS $< 1\%$ /<br>hypoxia response, TPS $\geq 1\%$ /<br>hypoxia response, TPS $< 1\%$ | 32 | 12 | 10 | 7 | 2 | 0 |

**B**

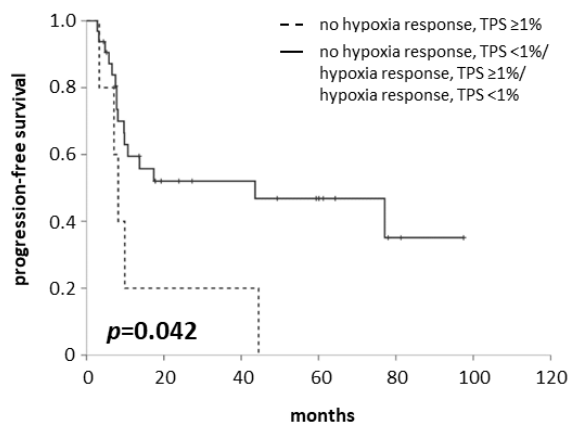

|                                                                                                           |    |    |    |   |   |   |
|-----------------------------------------------------------------------------------------------------------|----|----|----|---|---|---|
| no hypoxia response, TPS $\geq 1\%$                                                                       | 5  | 1  | 1  | 0 | 0 | 0 |
| no hypoxia response, TPS $< 1\%$ /<br>hypoxia response, TPS $\geq 1\%$ /<br>hypoxia response, TPS $< 1\%$ | 32 | 12 | 10 | 7 | 2 | 0 |
